# Supplementary material for: Unusual extraction of trivalent f-cations using diglycolamide dendrimers in a room temperature ionic liquid: extraction, spectroscopic and DFT studies
Source: Royal Society of Chemistry journal article supplement (doi:10.1039/c7dt03831c), 2017-01-01
Supplement: c7dt03831c1.pdf [file c7dt03831c1.pdf]

## **Unusual extraction of trivalent *f*-cations using diglycolamide dendrimers in a room temperature ionic liquid: extraction, spectroscopic and DFT studies**

Seraj Ahmad Ansari,<sup>a</sup> Prasanta Kumar Mohapatra<sup>a,\*</sup>, Andrea Leoncini,<sup>b</sup> Jurriaan Huskens,<sup>b</sup> Sk Musharaf Ali<sup>c</sup>, Ashish Singhadeb,<sup>c</sup> and Willem Verboom<sup>b</sup>

### **Electronic Supporting Information**

## 1. Kinetics of extraction studies

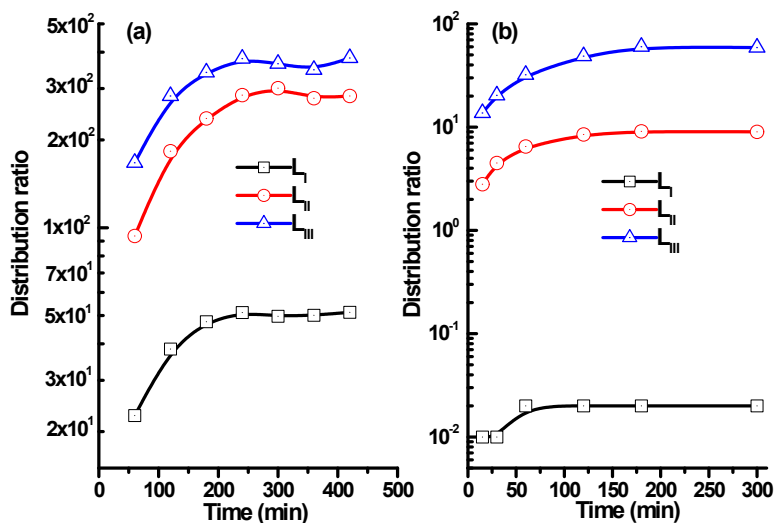

**Fig. S1** Kinetics for the extraction of Am<sup>3+</sup> at (a) 0.1 M HNO<sub>3</sub> and (b) 3 M HNO<sub>3</sub>.  
[L]: 0.1 mmol/L / [C<sub>4</sub>mim][Tf<sub>2</sub>N].

**Table S1** Extraction data and separation factor for Am and Eu by DGA-Dens L<sub>I-III</sub>.  
Ligand: 0.1 mmol/L in [C<sub>4</sub>mim][Tf<sub>2</sub>N]

| [HNO <sub>3</sub> ],<br>M | L <sub>I</sub>         |                        |                                                 | L <sub>II</sub>        |                        |                                                 | L <sub>III</sub>       |                        |                                                 |
|---------------------------|------------------------|------------------------|-------------------------------------------------|------------------------|------------------------|-------------------------------------------------|------------------------|------------------------|-------------------------------------------------|
|                           | <i>D</i> <sub>Am</sub> | <i>D</i> <sub>Eu</sub> | <i>D</i> <sub>Eu</sub> / <i>D</i> <sub>Am</sub> | <i>D</i> <sub>Am</sub> | <i>D</i> <sub>Eu</sub> | <i>D</i> <sub>Eu</sub> / <i>D</i> <sub>Am</sub> | <i>D</i> <sub>Am</sub> | <i>D</i> <sub>Eu</sub> | <i>D</i> <sub>Eu</sub> / <i>D</i> <sub>Am</sub> |
| 0.1                       | 52.2                   | 110                    | 2.11                                            | 261                    | 455.5                  | 1.75                                            | 344                    | 580                    | 1.69                                            |
| 1                         | 1.58                   | 5.62                   | 3.56                                            | 41.7                   | 96.5                   | 2.31                                            | 92.4                   | 210                    | 2.27                                            |
| 3                         | 0.02                   | 0.11                   | 5.50                                            | 9.48                   | 23.35                  | 2.46                                            | 52.0                   | 98.7                   | 1.90                                            |
| 4                         | 0.01                   | 0.04                   | 4.00                                            | 5.43                   | 14.3                   | 2.63                                            | 41.1                   | 73.8                   | 1.80                                            |
| 6                         | 0.01                   | 0.03                   | 3.00                                            | 2.83                   | 5.13                   | 1.81                                            | 22.3                   | 44.3                   | 1.99                                            |

**Table S2**  $SF$  values obtained for the extraction of  $\text{Am}^{3+}$  with respect to  $\text{UO}_2^{2+}$ ,  $\text{Cs}^+$  and  $\text{Sr}^{2+}$  ions using  $1.0 \times 10^{-4}$  M DGA-Dens  $\text{L}_{\text{I-III}}$  in  $[\text{C}_4\text{mim}][\text{Tf}_2\text{N}]$ . Aqueous phase: 3 M  $\text{HNO}_3$

| Ligand                  | $SF (D_{\text{Am}}/D_{\text{U}})$ | $SF (D_{\text{Am}}/D_{\text{Cs}})$ | $SF (D_{\text{Am}}/D_{\text{Sr}})$ |
|-------------------------|-----------------------------------|------------------------------------|------------------------------------|
| $\text{L}_{\text{I}}$   | 1                                 | 190                                | 1733                               |
| $\text{L}_{\text{II}}$  | 2                                 | 474                                | 5200                               |
| $\text{L}_{\text{III}}$ | 0.2                               | 95                                 | 520                                |

## 2. Luminescence spectroscopy of $\text{Eu}^{3+}$ ion

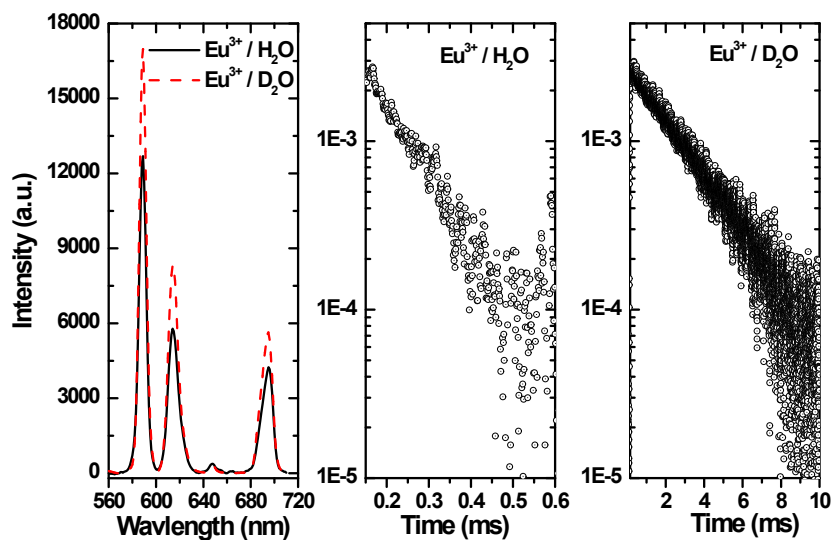

**Fig. S2** Emission spectra and fluorescence lifetime of  $\text{Eu}^{3+}$  in  $\text{H}_2\text{O}$  and  $\text{D}_2\text{O}$ .  
Excitation: 394 nm; Emission: 614 nm.

### 3. DFT Studies

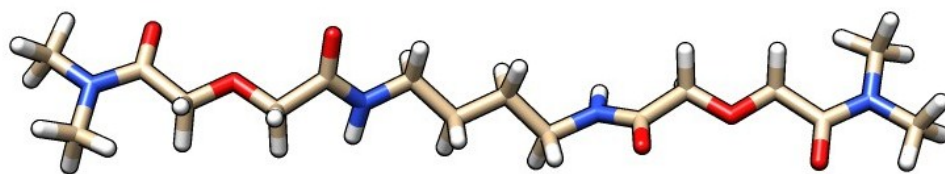

(a)

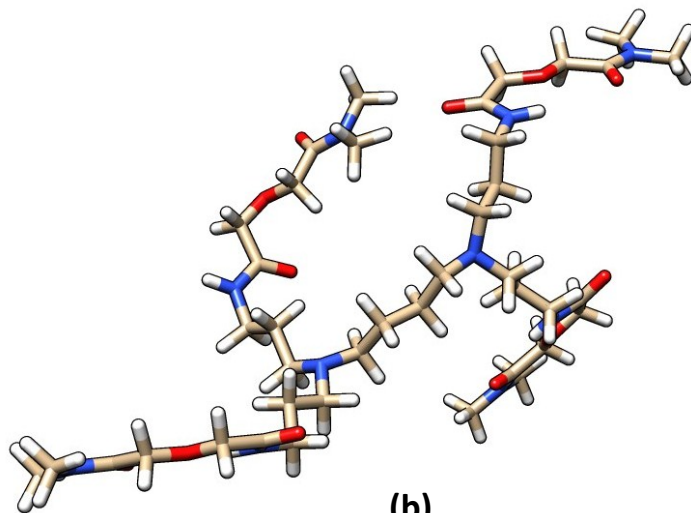

(b)

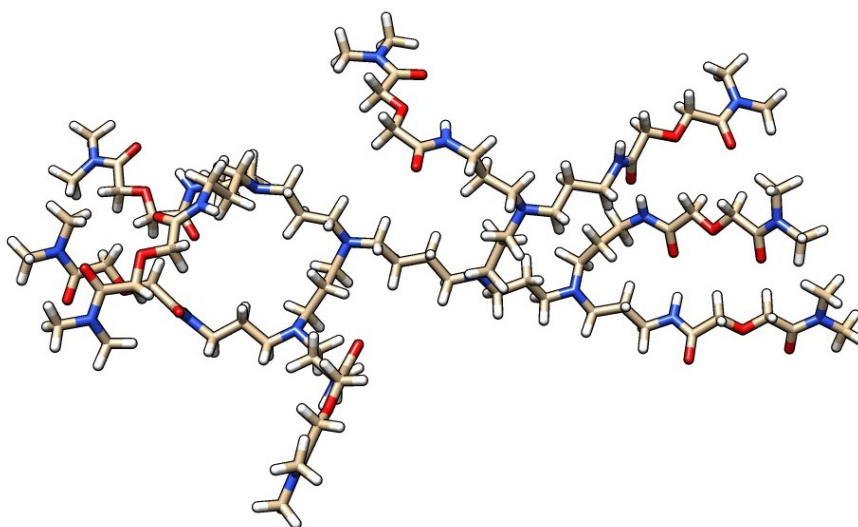

(c)

**Fig. S3** Optimized structures of (a)  $L_I$ , (b)  $L_{II}$  and (c)  $L_{III}$  at the B3LYP/SVP level of theory.

**Table S3** Calculated charge and orbital population using NBO analysis in ionic liquid phase at the B3LYP/TZVP level of theory

| System                                              | charge | <i>s</i> | <i>p</i> | <i>d</i> | <i>f</i> |
|-----------------------------------------------------|--------|----------|----------|----------|----------|
| (L <sub>I</sub> ) <sub>2</sub> -Am <sup>3+</sup> ,a | 2.045  | 4.14     | 11.98    | 10.69    | 6.13     |
| (L <sub>I</sub> ) <sub>2</sub> -Am <sup>3+</sup> ,b | 2.343  | 4.10     | 11.98    | 10.47    | 6.09     |
| L <sub>II</sub> -[Am <sup>3+</sup> ] <sub>2</sub>   | 2.289  | 4.10     | 11.98    | 10.51    | 6.11     |
|                                                     | 2.298  | 4.09     | 11.99    | 10.49    | 6.11     |
| L <sub>III</sub> -[Am <sup>3+</sup> ] <sub>4</sub>  | 2.357  | 4.09     | 11.98    | 10.44    | 6.11     |
|                                                     | 2.314  | 4.09     | 11.98    | 10.48    | 6.12     |
|                                                     | 2.336  | 4.09     | 11.98    | 10.47    | 6.10     |
|                                                     | 2.358  | 4.09     | 11.98    | 10.45    | 6.11     |

Note: a: Structure given in Fig. 7a; b: Structure given in Fig. 7b

**Table S4** Calculated quantum chemical descriptors in the gas phase at the B3LYP/TZVP level of theory

| System                                                | $\Delta E_{\text{LUMO-HOMO}}$<br>(eV) | $\eta$ (eV) | $\chi$ (eV) | $\Delta N$ |
|-------------------------------------------------------|---------------------------------------|-------------|-------------|------------|
| Am <sup>3+</sup> -<br>(H <sub>2</sub> O) <sub>9</sub> | 3.79                                  | 1.89        | 16.74       |            |
| L <sub>I</sub>                                        | 6.76                                  | 3.38        | 3.26        | 1.27       |
| L <sub>II</sub>                                       | 5.60                                  | 2.80        | 2.62        | 1.50       |
| L <sub>III</sub>                                      | 4.64                                  | 2.32        | 3.03        | 1.62       |
